# Supplementary material for: The Electroretinogram I-Wave, a Component Originating in the Retinal OFF-Pathway, Associates With a Myopia Genetic Risk Polymorphism
Source: PubMed Central journal article supplement (PMC11562975; doi:10.1167/iovs.65.13.21), 2024-11-12
Supplement: iovs-65-13-21_s001.pdf [file iovs-65-13-21_s001.pdf]

**Supplementary Table 1. Results of linear mixed model testing for association between genotype at the myopia risk locus (rs524952) and i-wave amplitudes before and after adjustment for covariates.**

| <b>Participants</b>                      | <b>Number</b> | <b>Frequency of risk allele</b> | <b>Covariates</b>                                    | <b>Beta (<math>\mu\text{V}</math>)</b> | <b>SE (<math>\mu\text{V}</math>)</b> | <b>p-value</b> |
|------------------------------------------|---------------|---------------------------------|------------------------------------------------------|----------------------------------------|--------------------------------------|----------------|
| All with genotypes and ERGs              | 184           | 0.524                           | None                                                 | -1.87                                  | 0.71                                 | 0.009          |
|                                          |               |                                 | Age, sex, familial relatedness                       | -1.83                                  | 0.82                                 | 0.027          |
| All with genotypes, ERGs and refractions | 175           | 0.511                           | Age, sex, familial relatedness                       | -1.80                                  | 0.85                                 | 0.035          |
|                                          |               |                                 | Age, sex, familial relatedness, spherical equivalent | -1.71                                  | 0.84                                 | 0.043          |
